# Supplementary material for: AlphaFlow: autonomous discovery and optimization of multi-step chemistry using a self-driven fluidic lab guided by reinforcement learning
Source: PubMed Central journal article supplement (PMC10015005; doi:10.1038/s41467-023-37139-y), 2023-03-14
Supplement: 41467_2023_37139_MOESM2_ESM.pdf [file 41467_2023_37139_MOESM2_ESM.pdf]

**File name:** Supplementary Movie 1

**Description:** A video of different AlphaFlow modules' operation
